# Supplementary material
Source: publisher figshare collection journal article supplement (https://acs.figshare.com/ndownloader/files/4214341)
Supplement: Supplementary file 1 [file 4214341]

## **C<sub>60</sub> Secondary Ion Fourier Transform Ion Cyclotron Resonance Mass Spectrometry**

Donald F. Smith<sup>1</sup>, Errol W. Robinson<sup>1</sup>, Aleksey V. Tolmachev<sup>1</sup>, Ron M.A. Heeren<sup>2</sup>, Ljiljana Pasa-Tolic<sup>1</sup>

- 1) Pacific Northwest National Laboratory, Richland, WA 99352
- 2) FOM Institute for Atomic and Molecular Physics (AMOLF), 1098 XG Amsterdam, The Netherlands

### **Table of Contents**

|                                                                                                                                    |     |
|------------------------------------------------------------------------------------------------------------------------------------|-----|
| Figure S-1: Schematic drawing of the C <sub>60</sub> SIMS source that has been coupled to a 12 T FT-ICR MS.....                    | S-2 |
| Figure S-2: C <sub>60</sub> SIMS FT-ICR MS of ~5 pmol gramicidin S. ....                                                           | S-3 |
| Table S-1: Sequence identification/annotation and performance metrics for CID MS/MS of gramicidin S (see Fig. 3 in main text)..... | S-4 |

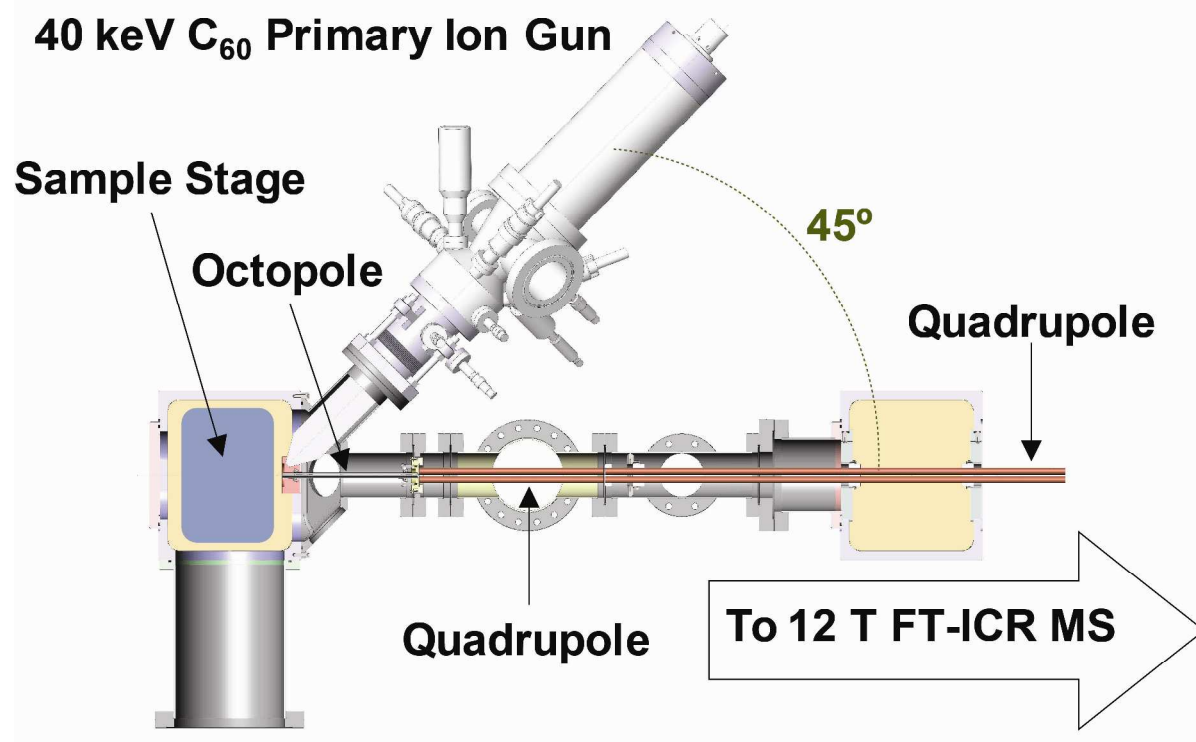

**Figure S-1:** Schematic drawing of the C<sub>60</sub> SIMS source that has been coupled to a 12 T FT-ICR MS.

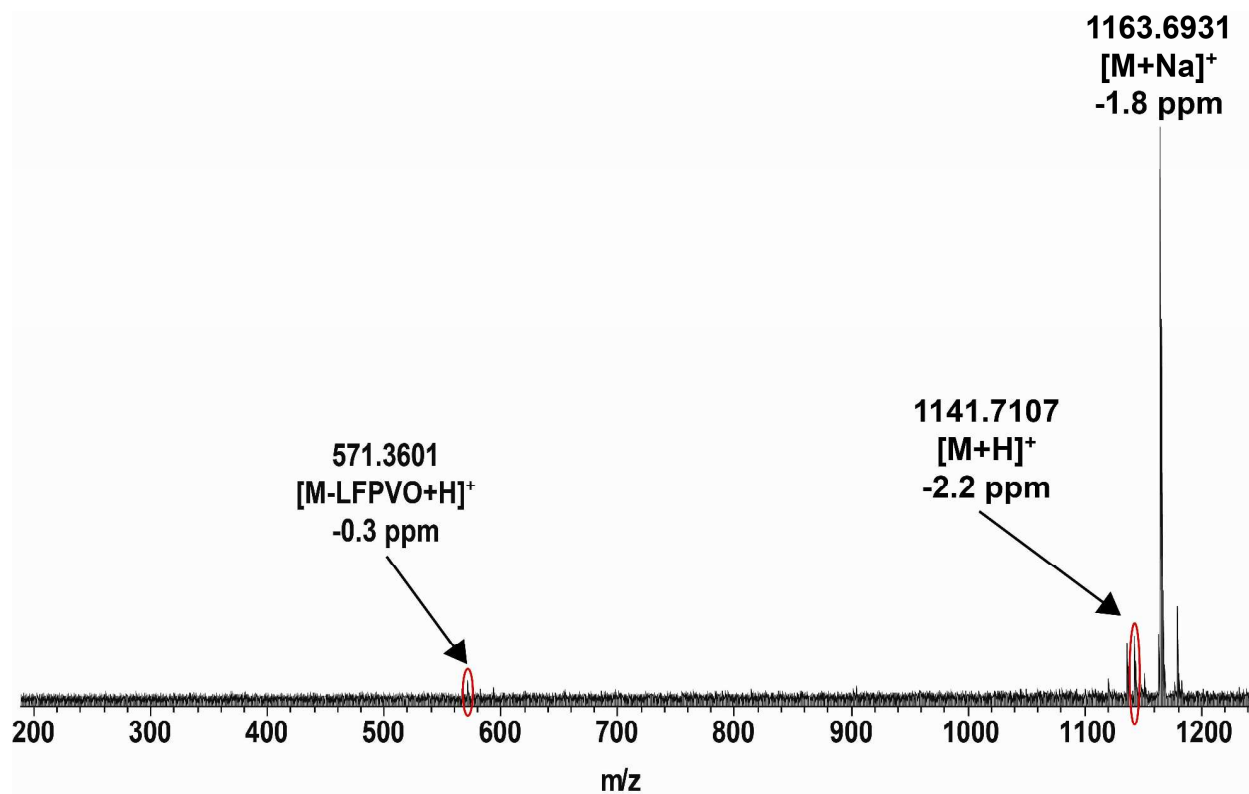

**Figure S-2:**  $C_{60}$  SIMS FT-ICR MS of ~5 pmol gramicidin S. The sodiated molecular ion dominates the mass spectrum and fragmentation is minimal. The ion at 571.3601  $m/z$  is half of the cyclodecapeptide.

| <u>Sequence</u>         | <u>Annotation</u>                  | <u>Mass<br/>Resolving<br/>Power</u> | <u>External Calibration</u> |              | <u>Internal Calibration</u> |              |
|-------------------------|------------------------------------|-------------------------------------|-----------------------------|--------------|-----------------------------|--------------|
|                         |                                    |                                     | Measured Mass               | MMA<br>(ppm) | Measured Mass               | MMA<br>(ppm) |
| PVO                     | b <sub>3PF</sub>                   | 199,564                             | 311.2077                    | -0.22        | 311.2077                    | -0.22        |
| LFPV-CO                 | b <sub>4LO</sub> -CO               | 152,268                             | 429.2862                    | 0.42         | 429.2863                    | 0.66         |
| LFPV                    | b <sub>4LO</sub>                   | 141,509                             | 457.2808                    | -0.29        | 457.2809                    | -0.07        |
| LFPVO                   | b <sub>5LO</sub> *                 | 109,941                             | 571.3600                    | -0.43        | 571.3604                    | 0.27         |
| LFPVO-H <sub>2</sub> O  | b <sub>6LO</sub> -H <sub>2</sub> O | 102,039                             | 666.4329                    | -1.27        | 666.4336                    | -0.22        |
| LFPVOF-H <sub>2</sub> O | b <sub>7LO</sub> -H <sub>2</sub> O | 78,030                              | 813.5004                    | -2.16        | 813.5017                    | -0.57        |
| LFPVOLF                 | b <sub>7LO</sub>                   | 64,985                              | 831.5119                    | -0.99        | 831.5132                    | 0.57         |
| LFPVOLFPV               | b <sub>9LO</sub>                   | 59,917                              | 1027.6330                   | -0.84        | 1027.6354                   | 1.49         |
| LFPVOLFPVO              | [M+H] <sup>+</sup>                 | 47,058                              | 1141.7091                   | -3.61        | 1141.7122                   | -0.89        |

**Table S-1:** Sequence identification/annotation and performance metrics for CID MS/MS of gramicidin S (see Fig. 3 in main text). The spectrum was internally calibrated with respect to all ions indicated in the table. \*The ion at 571.36 m/z is half of the cyclodecapeptide. Thus, it could be any of the following fragments: b<sub>5LO</sub>, b<sub>5FL</sub>, b<sub>5PF</sub>, b<sub>5VP</sub>, b<sub>5OV</sub>, b<sub>5FL</sub>, b<sub>5PF</sub>, b<sub>5VP</sub> or b<sub>5OV</sub>. It is indicated here as b<sub>5LO</sub> due to the identification of the other ions, where the cyclic peptide is broken at LO to form a decomposing linear ion.
